# Supplementary material for: Identification and functional characterization of a Siglec-7 counter-receptor on K562 cells
Source: PubMed Central journal article supplement — J Biol Chem. 2021 Feb 26;296:100477. doi: 10.1016/j.jbc.2021.100477 (PMC8040268; doi:10.1016/j.jbc.2021.100477), 2021-02-26
Supplement: mmc1.pdf [file mmc1.pdf]

**Table S1 Identified proteins by MS analysis for 110kDa area**

| ProtScore | % Cov | % Cov (50) | % Cov (95) | Name                                                                     | Gene name        | Accession # |
|-----------|-------|------------|------------|--------------------------------------------------------------------------|------------------|-------------|
| 2.03      | 44.5  | 2          | 2          | Leukosialin                                                              | <i>SPN</i>       | P16150      |
| 1.51      | 21.3  | 8.1        | 4.5        | Glutathione hydrolase 6                                                  | <i>GGT6</i>      | Q6P531      |
| 1.5       | 68.2  | 3.5        | 3.5        | Desert hedgehog protein                                                  | <i>DHH</i>       | O43323      |
| 1.48      | 39.1  | 6.2        | 6.2        | Kallikrein-10                                                            | <i>KLK10</i>     | O43240      |
| 1.35      | 52.4  | 10.7       | 10.7       | Small integral membrane protein 32                                       | <i>SMIM32</i>    | A0A1B0      |
| 1.3       | 34.2  | 6.3        | 6.3        | DCN1-like protein 5                                                      | <i>DCUN1D5</i>   | Q9BTE7      |
| 1.25      | 60    | 2.2        | 0          | Heterogeneous nuclear ribonucleoprotein U                                | <i>HNRNP1U</i>   | Q00839      |
| 1.23      | 69.5  | 4.1        | 4.1        | Ankyrin repeat domain-containing protein SOWAHD                          | <i>SOWAHD</i>    | A6NJG2      |
| 1.19      | 48.9  | 2.1        | 0          | AT-rich interactive domain-containing protein 4A                         | <i>ARIDA4</i>    | P29374      |
| 1.13      | 61.7  | 5.8        | 0          | ZW10 interactor                                                          | <i>ZWINT</i>     | Q95229      |
| 1.12      | 41    | 2.2        | 0          | Inactive phospholipase D5                                                | <i>PLD5</i>      | Q8N7P1      |
| 1.12      | 38.2  | 1          | 0          | Serine/threonine-protein kinase LMTK3                                    | <i>LMTK3</i>     | Q96C04      |
| 1.11      | 40.9  | 4.4        | 0          | Squalene monooxygenase                                                   | <i>SQLE</i>      | Q14534      |
| 1.07      | 28    | 2.4        | 0          | Urocanate hydratase                                                      | <i>UROC1</i>     | Q96N76      |
| 1.05      | 55.1  | 0.8        | 0          | PHD and RING finger domain-containing protein 1                          | <i>PHRF1</i>     | Q9P1Y6      |
| 0.99      | 48.5  | 2.4        | 0          | WSC domain-containing protein 1                                          | <i>WSCD1</i>     | Q658N2      |
| 0.98      | 37.3  | 1.8        | 0          | Phosphoinositide 3-kinase regulatory subunit 5                           | <i>PIK3R5</i>    | Q8WYR1      |
| 0.97      | 51.5  | 1.5        | 0          | OTU domain-containing protein 7A                                         | <i>OTUD7A</i>    | Q8TE49      |
| 0.96      | 25.8  | 4.2        | 0          | Transmembrane protease serine 3                                          | <i>TMPRSS3</i>   | P57727      |
| 0.95      | 20.3  | 6          | 6          | Tumor necrosis factor ligand superfamily member 15                       | <i>TNFSF15</i>   | Q95150      |
| 0.92      | 38.5  | 1.7        | 0          | Otoferrin                                                                | <i>OTOF</i>      | Q9HC10      |
| 0.91      | 26.9  | 3          | 0          | Matrix metalloproteinase-15                                              | <i>MMP15</i>     | P51511      |
| 0.9       | 55.2  | 7.1        | 0          | Ras-related protein Rab-40C                                              | <i>RAB40C</i>    | Q96S21      |
| 0.88      | 41.3  | 1.2        | 0          | Oligophrenin-1                                                           | <i>OPHN1</i>     | Q60890      |
| 0.87      | 36.8  | 4.8        | 0          | Ectonucleotide pyrophosphatase/phosphodiesterase family member 6         | <i>ENPP6</i>     | Q6UWR7      |
| 0.85      | 35.6  | 0.3        | 0          | E3 ubiquitin-protein ligase MYCBP2                                       | <i>MYCBP2</i>    | O75592      |
| 0.85      | 30.5  | 6.6        | 0          | Trans-1,2-dihydrobenzene-1,2-diol dehydrogenase                          | <i>DHDH</i>      | Q9U010      |
| 0.84      | 43.1  | 6.4        | 6.4        | Microtubule-associated protein RP/EB family member 3                     | <i>MAPP3E</i>    | Q9UPY8      |
| 0.83      | 26.7  | 2.9        | 0          | Guanylate cyclase soluble subunit beta-1                                 | <i>GUCY1B1</i>   | Q02153      |
| 0.82      | 51.2  | 2.3        | 0          | Putative ciliary rootlet coiled-coil protein 2                           | <i>CROCC2</i>    | H7BZ55      |
| 0.81      | 43    | 0.9        | 0          | TBC1 domain family member 9                                              | <i>TBC1D9</i>    | Q6ZT07      |
| 0.79      | 29    | 0.7        | 0          | Zinc finger ZZ-type and EF-hand domain-containing protein 1              | <i>ZZEF1</i>     | O43149      |
| 0.79      | 57.6  | 3          | 0          | Calcium-binding protein 1                                                | <i>CABP1</i>     | Q9NZU7      |
| 0.78      | 47.7  | 1.9        | 0          | Heat shock protein 105 kDa                                               | <i>HSPH1</i>     | Q92598      |
| 0.78      | 27.1  | 2.3        | 0          | Sodium/hydrogen exchanger 4                                              | <i>SLC9A4</i>    | Q6AH14      |
| 0.78      | 63.2  | 7.2        | 0          | Uncharacterized protein C8orf86                                          | <i>C8orf86</i>   | Q6ZUL3      |
| 0.78      | 41.2  | 5.1        | 0          | Collectin-10                                                             | <i>COLEC10</i>   | Q9Y6Z7      |
| 0.76      | 40    | 1.6        | 0          | SLIT-ROBO Rho GTPase-activating protein 2                                | <i>SRGAP2</i>    | O75044      |
| 0.76      | 39.4  | 2.9        | 0          | Alpha-1,3-mannosyl-glycoprotein 4-beta-N-acetylglucosaminyltransferase B | <i>MGAT4B</i>    | Q9U053      |
| 0.74      | 32.2  | 0.2        | 0          | Transmembrane protein KIAA1109                                           | <i>KIAA1109</i>  | Q2LD37      |
| 0.74      | 36.8  | 0.5        | 0          | Pre-mRNA-processing-splicing factor 8                                    | <i>PRPF8</i>     | Q6P2Q9      |
| 0.74      | 50.2  | 0.9        | 0          | Partitioning defective 3 homolog B                                       | <i>PARDB3B</i>   | Q8TEW8      |
| 0.74      | 79.6  | 11.1       | 0          | 28 kDa heat- and acid-stable phosphoprotein                              | <i>PDAF1</i>     | Q13442      |
| 0.72      | 42.7  | 0.6        | 0          | Nck-associated protein 5                                                 | <i>NCKAP5</i>    | O14513      |
| 0.69      | 16    | 1.9        | 0          | Pantetheinase                                                            | <i>VNN1</i>      | Q95497      |
| 0.68      | 44.1  | 0.3        | 0          | A-kinase anchor protein 9                                                | <i>AKAP9</i>     | Q99996      |
| 0.68      | 37.3  | 0.8        | 0          | Paternally-expressed gene 3 protein                                      | <i>PEG</i>       | Q9GZU2      |
| 0.67      | 35.6  | 1.7        | 0          | Ral guanine nucleotide dissociation stimulator-like 1                    | <i>RGL1</i>      | Q9NZL6      |
| 0.67      | 41.8  | 2.8        | 0          | Myotilin                                                                 | <i>MYOT</i>      | Q9UBF9      |
| 0.67      | 43.4  | 3.8        | 0          | Putative FERM domain-containing protein FRMD8P1                          | <i>FRMD8P1</i>   | Q9BZ68      |
| 0.67      | 37.4  | 5.2        | 0          | Homeobox protein Hox-A5                                                  | <i>HOXA5</i>     | P20719      |
| 0.66      | 51.6  | 1.8        | 0          | GAS2-like protein 2                                                      | <i>GAS2L2</i>    | Q8NHY3      |
| 0.66      | 23.5  | 1.9        | 0          | Klotho                                                                   | <i>KL</i>        | Q9UEF7      |
| 0.65      | 48.6  | 1.2        | 0          | Tyrosine-protein kinase BAZ1B                                            | <i>BAZ1B</i>     | Q9UIG0      |
| 0.65      | 49.5  | 3.3        | 0          | Coiled-coil domain-containing protein 181                                | <i>CCDC181</i>   | Q5TID7      |
| 0.65      | 26.7  | 1          | 0          | Alpha-2-macroglobulin                                                    | <i>A2M</i>       | P01023      |
| 0.65      | 42    | 3.2        | 0          | Palmitoyltransferase ZDHHC5                                              | <i>ZDHHC5</i>    | Q9C0B5      |
| 0.65      | 42.2  | 2.3        | 0          | Ribosomal protein S6 kinase alpha-1                                      | <i>RPS6KA1</i>   | Q15418      |
| 0.65      | 36.4  | 1.9        | 0          | Exocyst complex component 6B                                             | <i>EXOC6B</i>    | Q9Y2D4      |
| 0.61      | 42.6  | 1.3        | 0          | Unconventional myosin-1f                                                 | <i>MYO1F</i>     | O00160      |
| 0.61      | 36.4  | 3.2        | 0          | Sorting nexin-20                                                         | <i>SNX20</i>     | Q7Z614      |
| 0.6       | 36.3  | 1.3        | 0          | PR domain zinc finger protein 2                                          | <i>PRDM2</i>     | Q13029      |
| 0.6       | 45.6  | 0.6        | 0          | Chromodomain-helicase-DNA-binding protein 4                              | <i>CHD4</i>      | Q14839      |
| 0.59      | 37.2  | 1.1        | 0          | Putative ATP-dependent RNA helicase DHX57                                | <i>DHX57</i>     | Q6P158      |
| 0.59      | 64.3  | 2          | 0          | Protein FAM47B                                                           | <i>FAM47B</i>    | Q8NA70      |
| 0.58      | 28.8  | 0.6        | 0          | HEAT repeat-containing protein 5A                                        | <i>HEATR5A</i>   | Q86XA9      |
| 0.56      | 29.7  | 4          | 0          | Butyrophilin-like protein 2                                              | <i>BTNL2</i>     | Q9UIR0      |
| 0.55      | 33.4  | 1.5        | 0          | Zinc finger protein 40                                                   | <i>HIVEP1</i>    | P15822      |
| 0.55      | 40.5  | 0.7        | 0          | Ankyrin-2                                                                | <i>ANK2</i>      | Q01484      |
| 0.54      | 45.3  | 1.7        | 0          | Ubiquitin carboxyl-terminal hydrolase 36                                 | <i>USP36</i>     | Q9P275      |
| 0.54      | 43.2  | 1.9        | 0          | Collagen alpha-3(V) chain                                                | <i>COL5A3</i>    | P25940      |
| 0.54      | 50.5  | 2.6        | 0          | Spermatogenesis-associated serine-rich protein 2                         | <i>SPATS2</i>    | Q86XZ4      |
| 0.54      | 30.9  | 1.7        | 0          | Oxysterol-binding protein 2                                              | <i>OSBP2</i>     | Q969R2      |
| 0.54      | 41.3  | 2.6        | 0          | Serine/threonine-protein kinase PINK1, mitochondrial                     | <i>PINK1</i>     | Q9BXM7      |
| 0.54      | 36.1  | 2          | 0          | Pantothenate kinase 1                                                    | <i>PANK1</i>     | Q8TE04      |
| 0.53      | 40.9  | 0.9        | 0          | Microtubule-associated protein 2                                         | <i>MAP2</i>      | P11137      |
| 0.53      | 67.4  | 3.4        | 0          | IQ domain-containing protein C                                           | <i>IQCC</i>      | Q4KMZ1      |
| 0.53      | 25.1  | 0.9        | 0          | Condensin-2 complex subunit G2                                           | <i>NCAPG2</i>    | Q86X12      |
| 0.53      | 37.4  | 1.5        | 0          | Procollagen-lysine,2-oxoglutarate 5-dioxygenase 1                        | <i>PLOD1</i>     | Q02809      |
| 0.53      | 58.3  | 5.3        | 0          | Dickkopf-related protein 1                                               | <i>DKK1</i>      | O94907      |
| 0.53      | 44.3  | 2.5        | 0          | Collagen and calcium-binding EGF domain-containing protein 1             | <i>CCBE1</i>     | Q6UXH8      |
| 0.52      | 50.7  | 2.3        | 0          | Junctophilin-1                                                           | <i>JPH1</i>      | Q9HDC5      |
| 0.52      | 16    | 1.6        | 0          | Lipoma-preferred partner                                                 | <i>LPP</i>       | Q93052      |
| 0.51      | 32.5  | 0.5        | 0          | Zinc finger protein 469                                                  | <i>ZNF469</i>    | Q96JG9      |
| 0.51      | 37    | 2.1        | 0          | Transmembrane protease serine 11F                                        | <i>TMPRSS11F</i> | Q6ZWK6      |
| 0.51      | 43    | 3.8        | 0          | GH3 domain-containing protein                                            | <i>GHDC</i>      | Q8N2G8      |
| 0.51      | 33.6  | 17.8       | 0          | Ninjurin-1                                                               | <i>NINJ1</i>     | Q92982      |
| 0.5       | 43.4  | 1.6        | 0          | UV radiation resistance-associated gene protein                          | <i>UVRAG</i>     | Q9P2Y5      |
| 0.5       | 38.5  | 4.5        | 0          | Ribonuclease H1                                                          | <i>RNASEH1</i>   | O60930      |
| 0.49      | 37.6  | 1.1        | 0          | FERM and PDZ domain-containing protein 4                                 | <i>FRMPD4</i>    | Q14CM0      |
| 0.49      | 23.1  | 1.2        | 0          | Solute carrier family 12 member 1                                        | <i>SLC12A1</i>   | Q13621      |
| 0.48      | 45.5  | 0          | 0          | Histone-lysine N-methyltransferase ASH1L                                 | <i>ASH1L</i>     | Q9NR48      |
| 0.47      | 94.8  | 9.4        | 0          | Histone H1.2                                                             | <i>HIST1H1C</i>  | P16403      |
| 0.47      | 33.8  | 1.1        | 0          | Phosphatidylinositol phosphatase SAC2                                    | <i>INPP5F</i>    | Q9Y2H2      |
| 0.47      | 28.6  | 2.6        | 0          | Protein FAM69C                                                           | <i>FAM69C</i>    | Q0P6D2      |
| 0.47      | 23.8  | 1          | 0          | Neogenin                                                                 | <i>NEO1</i>      | Q92859      |

A representative of the MS results for 110kDa-gp. The ProtScore indicates the reliability of the results, and the higher score is better. % Cov is the coverage of the identified peptide fragment in the amino acid sequence. % Cov (50) and % Cov (90) are the coverages of peptide fragments with a reliability of more than 50% and 90%, respectively. The list includes the proteins ranked at higher than 0.47 of the ProtScore (reliability 66%). Accession # is from the Swiss-Prot database.
